# Supplementary material for: The landscape of circulating platelet aggregates in COVID-19
Source: Research Square preprint supplement (doi:10.21203/rs.3.rs-439419/v1), 2021-05-03
Supplement: Supplementary file 1 [file 054af938410f3425fd8bfd78.xlsx]

## Sheet: Sheet1
	All patients	Mild patients	Moderate patients	Severe patients	p value	Survivors	Non-survivors	p value
	n = 110	n = 23	n = 68	n = 19		n = 99	n = 11
Age, years	65.0 (52.0-73.5)	53.0 (36.0-65.0)	65.5 (53.3-78.0)	70.0 (65.0-73.0)	0.0004	62.0 (49.0-73.0)	83.0(72.0-88.0)	< 0.0001
Sex					0.077			0.75
Male	73 (66%)	11 (48%)	47 (69%)	15 (79%)		65 (66%)	8 (73%)
Female	37 (34%)	12 (52%)	21 (31%)	4 (21%)		34 (34%)	3 (27%)
Comorbidity
Hypertension	55 (50%)	11 (48%)	33 (49%)	11 (58%)	0.75	49 (49%)	6 (55%)	0.95
Diabetes	35 (32%)	7 (30%)	19 (30%)	9 (47%)	0.27	31 (31%)	4 (36%)	0.74
Obesity, BMI > 25	38 (35%)	7 (30%)	27 (40%)	4 (21%)	0.29	36 (36%)	2 (18%)	0.32
COPD	4 (4%)	0	3 (4%)	1 (6%)	0.95	2 (2%)	2 (18%)	0.049
Coronary heart disease	6 (5%)	0	5 (7%)	1 (6%)	0.95	4 (4%)	2 (18%)	0.11
Chronic liver disease	9 (8%)	3 (13%)	4 (6%)	2 (12%)	0.95	8 (8%)	1 (9%)	0.95
Chronic kidney disease	9 (8%)	3 (13%)	4 (6%)	2 (11%)	0.95	7 (7%)	2 (18%)	0.22
Active malignancy	7 (6%)	0	6 (9%)	1 (6%)	0.95	5 (5%)	2 (18%)	0.14
Antiplatelet therapy at baseline	15 (14%)	3 (13%)	11 (16%)	1 (6%)	0.95	14 (14%)	1 (9%)	0.95
Anticoagulant therapy on the first measurement day	76 (69%)	13 (57%)	45 (66%)	18 (95%)	0.02	67 (68%)	9 (82%)	0.5
Laboratory findings on the first measurement day
Leukocyte count, ×109/L	6.4 (4.2-9.8)	4.0 (3.1–4.8)	6.9 (4.7-9.6)	11.1 (9.0-14.5)	< 0.0001	6.1 (4.2-9.7)	8.4 (7.0-10.7)	0.13
Platelet count, ×109/L	236.5 (181.8-299.3)	227.0 (175.0-245.0)	248.5 (183.0-312.0)	212.0 (180.0-328.0)	0.32	243.0 (186.0-308.0)	180.0 (132.0-209.0)	0.017
ALT, U/L	27.5 (14.0-49.8)	13.0 (12.0-27.0)	31.0 (17.0-51.3)	34.0 (14.0-105.0)	0.013	25.0 (14.0-49.0)	35.0 (17.0-92.0)	0.23
Creatinine, µmol/L	69.4 (58.1-80.7)	64.5 (54.8-78.7)	69.4 (61.0-81.8)	69.8 (59.2-115.8)	0.42	68.1 (57.5-79.6)	76.0 (69.0-155.6)	0.25
Lactate dehydrogenase, U/L	301.0 (220.8-379.5)	205.0 (169.0-240.0)	310.5 (238.3-359.0)	560.0 (384.0-660.0)	< 0.0001	290.0 (216.0-360.0)	564.0 (342.0-636.0)	< 0.0001
C-reactive protein, mg/L	4.15 (1.54-7.87)	0.32 (0.09-2.52)	5.24 (2.20-9.44)	6.66 (3.72-18.81)	< 0.0001	6.37 (3.02-20.56)	3.88 (1.25-7.50)	0.0077
D-dimer, µg/mL
≤ 1	48 (44%)	19 (83%)	28 (41%)	1 (5%)	< 0.0001	47 (47%)	1 (9%)	0.022
> 1	62 (56%)	4 (17%)	40 (59%)	18 (95%)		52 (53%)	10 (91%)
Anticoagulant therapy on the highest concentration day	84 (76%)	15 (65%)	51 (75%)	18 (95%)	0.074	76 (77%)	8 (73%)	0.72
Laboratory findings on the first measurement day
Leukocyte count, ×109/L	8.0 ( 4.7-10.9)	4.3 (3.2-5.0)	8.2 (5.4-10.5)	12.9 (9.7-15.9)	<0.0001	7.6 (4.5-10.1)	13.3 (8.2-20.1)	<0.0001
Platelet count, ×109/L	263.0 (197.8-327.3)	227.0 (185.0-245.0)	276.0 (202.0-337.0)	261.0 (202.0-371.0)	0.046	269.0 (200.0-332.0)	221.0 (158.0-261.0)	0.019
ALT, U/L	31.0 (16.0-62.0)	16.0 (12.0-25.0)	33.5 (19.3-68.8)	38.0 (22.0-78.0)	0.017	30.0 (15.0-62.0)	38.0 (28.0-92.0)	0.19
Creatinine, µmol/L	68.5 (55.7-83.3)	69.0 (54.8-78.7)	68.1 (57.7-79.1)	69.8 (54.8-100.8)	0.32	67.2 (54.8-77.8)	100.8 (83.1-173.3)	0.12
Lactate dehydrogenase, U/L	280.0 (215.8-374.0)	210.0 (170.0-240.0)	301.0 (229.8-363.3)	420.0 (324.0-509.0)	<0.0001	257.0 (211.0-351.0)	544.0 (389.0-695.0)	<0.0001
C-reactive protein, mg/L	2.52 (0.63-6.96)	0.39 (0.09-2.57)	2.72 (1.05-7.27)	6.01 (1.83-19.62)	0.0004	2.23 (0.51-6.60)	9.45 (1.11-26.31)	<0.0001
D-dimer, µg/mL
≤ 1	43 (39%)	19 (83%)	23 (34%)	1 (5%)	<0.0001	43 (43%)	0	0.0002
> 1	67 (61%)	4 (17%)	45 (66%)	18 (95%)		56 (57%)	11 (100%)
